# Supplementary material
Source: PubMed Central journal article supplement (PMC4945462)
Supplement: NIHMS743331-supplement-01.pdf [file NIHMS743331-supplement-01.pdf]

**Supplemental Figure 1: Distribution of non-HLA GRS**

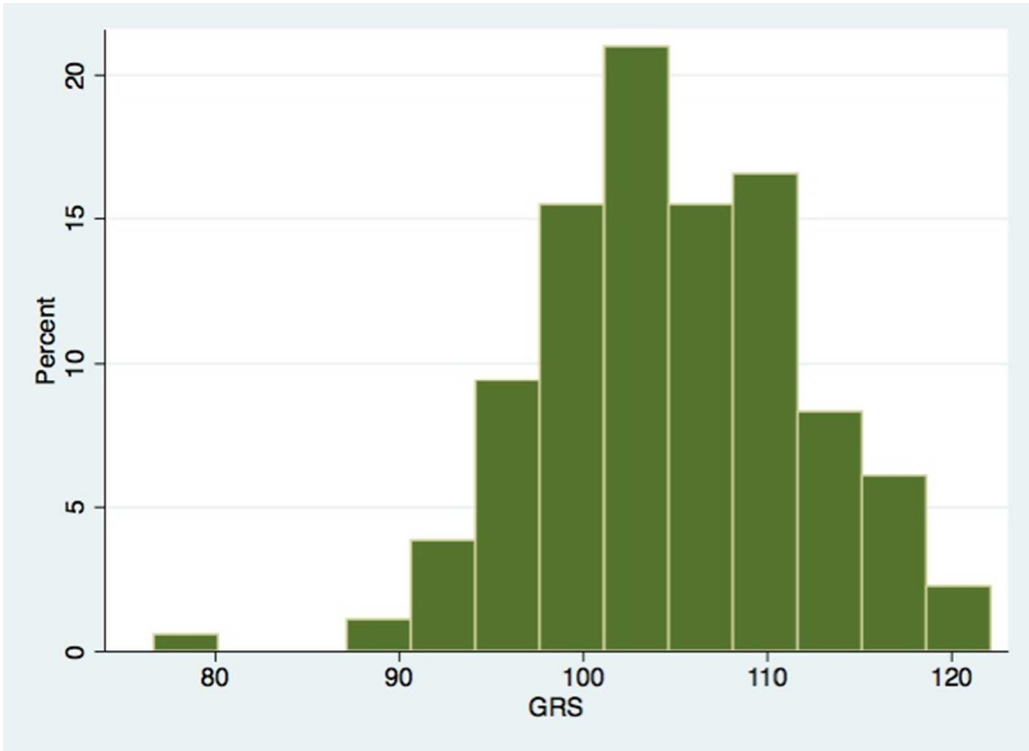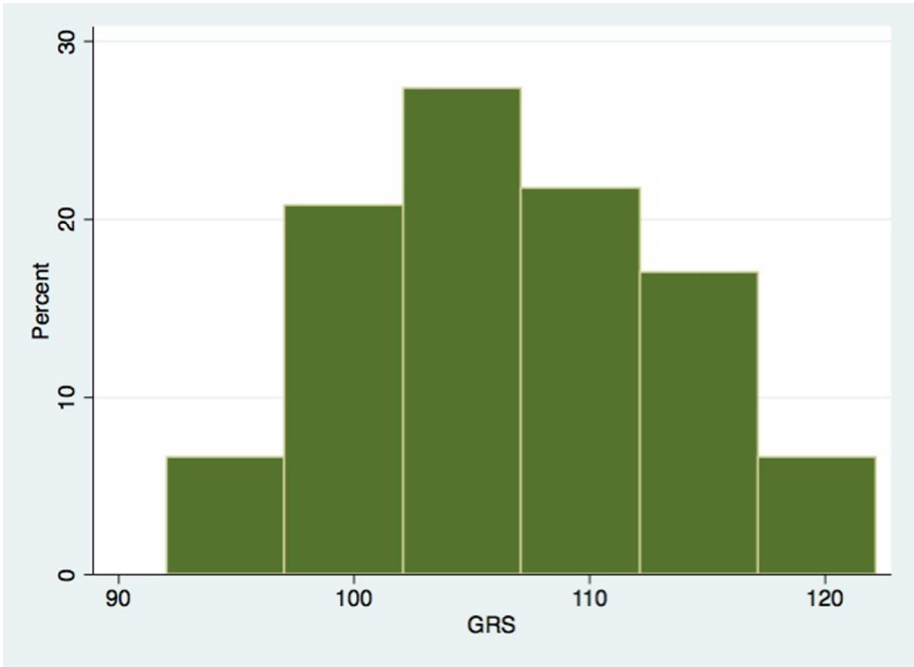

A) Histogram of GRS scores for pediatric MS subjects B) Histogram of GRS scores for pediatric MS subjects with greater than 50% European ancestry
